# Supplementary material for: Identification of novel common breast cancer risk variants at the 6q25 locus among Latinas
Source: Breast Cancer Res. 2019 Jan 14;21:3. doi: 10.1186/s13058-018-1085-9 (PMC6332913; doi:10.1186/s13058-018-1085-9)
Supplement: Supplementary file 3 — Table S6. Results of the top candidate SNPs analyzed using RegulomeDB (XLSX 12 kb) [file 13058_2018_1085_MOESM3_ESM.xlsx]

## Sheet: Sheet1
Table S6: Results of RegulomeDB Analysis
Position	rsid	hits	score	Interpretation
Cluster 1: Index SNP rs140068132
6:151954834	rs140068132	Motifs|PWM||Pbx-1, Motifs|Footprinting|Mcf7|Pbx-1, Motifs|Footprinting|Hepg2|Pbx-1, Motifs|Footprinting|Mcf7Hypoxlac|Pbx-1, Motifs|Footprinting|Huh75|Pbx-1, Chromatin_Structure|Est10nm30m|DNase-seq|T47d, Chromatin_Structure||DNase-seq|T47d, Chromatin_Structure|Estctrl0h|DNase-seq|Mcf7, Chromatin_Structure||DNase-seq|Huh75, Chromatin_Structure|Ctcfshrna|DNase-seq|Mcf7, Chromatin_Structure||DNase-s…	2b	TF binding AND any motif AND DNase Footprint AND DNase peak
6:151971376	rs147157845	Motifs|PWM||ONECUT2, Motifs|PWM||ONECUT3, Motifs|PWM||ONECUT1, Motifs|PWM||CDP, Motifs|PWM||FOXO1	6	Other
Cluster 2: Index SNP rs851980
6:152023191	rs851984	Motifs|PWM||Gata3, Motifs|PWM||Gata6, Chromatin_Structure||DNase-seq|Th1wb33676984, Chromatin_Structure||FAIRE|Gm19239, Chromatin_Structure||DNase-seq|Th1wb54553204, Chromatin_Structure||DNase-seq|Gcbcell, Chromatin_Structure||DNase-seq|Cll, Chromatin_Structure||DNase-seq|Tregwb83319432, Chromatin_Structure||DNase-seq|Mcf7, Chromatin_Structure||DNase-seq|T47d, Chromatin_Structure||DNase-seq|Huh7,…	2c	TF binding AND matched TF motif AND DNase peak
6:152024415	rs851983	Chromatin_Structure||DNase-seq|Saec, Chromatin_Structure||DNase-seq|Fibrobl, Chromatin_Structure|Tam10030|DNase-seq|Ishikawa, Chromatin_Structure|Est10nm30m|DNase-seq|Ishikawa, Chromatin_Structure||DNase-seq|Mcf7, Chromatin_Structure||DNase-seq|Fibroblgm03348, Chromatin_Structure||DNase-seq|Prec, Chromatin_Structure|Est100nm1h|DNase-seq|Mcf7, Chromatin_Structure|Hypoxlaccon|DNase-seq|Mcf7, Chroma…	4	DNAse AND TF Binding
6:152027955	rs851980	Chromatin_Structure|Diffa5d|DNase-seq|H7es, Chromatin_Structure||DNase-seq|Mcf7, Chromatin_Structure|Ctcfshrna|DNase-seq|Mcf7, Chromatin_Structure|Hypoxlac|FAIRE|Mcf7, Chromatin_Structure||DNase-seq|H7es, Chromatin_Structure|Randshrna|DNase-seq|Mcf7, Protein_Binding||ChIP-seq|MCF-7|ZNF217, Protein_Binding||ChIP-seq|MCF-7|E2F1, Protein_Binding||ChIP-seq|K562|RFX3	4	DNAse AND TF Binding
6:152024985	rs851982	Chromatin_Structure||DNase-seq|Mcf7, Chromatin_Structure|Est100nm1h|DNase-seq|Mcf7, Protein_Binding||ChIP-seq|MCF-7|E2F1	4	DNAse AND TF Binding
6:152020390	rs851985	Chromatin_Structure||DNase-seq|Nhdfneo, Chromatin_Structure||DNase-seq|Nhdfad	5	DNAse OR TF Binding
6:152040615	rs3020339	Protein_Binding|differential|ChIP-seq|Caco2|HNF4A	5	DNAse OR TF Binding
6:152042260	rs10484921	Chromatin_Structure|Lenticon|DNase-seq|Fibroblgm03348, Chromatin_Structure||DNase-seq|Fibrobl, Chromatin_Structure||DNase-seq|Fibrop, Chromatin_Structure||DNase-seq|Fibroblgm03348, Chromatin_Structure|Hypoxlac|FAIRE|Mcf7	5	DNAse OR TF Binding
6:152034062	rs80040583	Motifs|PWM||TCF-4	6	Other
6:152031303	rs851975	Motifs|PWM||Cdx	6	Other
6:152038240	rs6932703	Motifs|PWM||MAZ, Motifs|PWM||CKROX	6	Other
6:152040125	rs12526447	Motifs|PWM||SPIB, Motifs|PWM||SPI-B, Motifs|PWM||SPIC, Motifs|PWM||Sfpi1, Motifs|PWM||PU1	6	Other
6:152027074	rs851981	Motifs|PWM||ERRalpha, Motifs|PWM||VDR=CAR=PXR, Chromatin_Structure|Hypoxlac|FAIRE|Mcf7	6	Other
6:152034624	rs141222583	No data	7
6:152034758	rs112911222	No data	7
6:152034820	rs112366525	No data	7
6:152044884	rs7749659	No data	7
Cluster 3: Index SNP rs3776809
6:152129588	rs6914438	Chromatin_Structure||DNase-seq|Progfib, Chromatin_Structure||DNase-seq|H1hesc, Chromatin_Structure|Lenticon|DNase-seq|Fibroblgm03348, Chromatin_Structure||DNase-seq|Adultcd4th0, Chromatin_Structure||DNase-seq|Fibrobl, Chromatin_Structure||DNase-seq|Ipsnihi7, Chromatin_Structure|Tam10030|DNase-seq|Ishikawa, Chromatin_Structure|Andro|DNase-seq|Lncap, Chromatin_Structure||DNase-seq|Adultcd4th1, Chro…	4	DNAse AND TF Binding
6:152126824	rs2071454	Chromatin_Structure||DNase-seq|Progfib, Chromatin_Structure||DNase-seq|H1hesc, Chromatin_Structure|Lenticon|DNase-seq|Fibroblgm03348, Chromatin_Structure|Diffa14d|DNase-seq|H7es, Chromatin_Structure||DNase-seq|Fibrobl, Chromatin_Structure|Diffa5d|DNase-seq|H7es, Chromatin_Structure||DNase-seq|Hff, Chromatin_Structure||DNase-seq|K562, Chromatin_Structure||DNase-seq|Hpdlf, Chromatin_Structure|Tam10…	4	DNAse AND TF Binding
6:152133187	rs3778609	Motifs|PWM||E2F-1, Chromatin_Structure||DNase-seq|Mcf7, Chromatin_Structure|Est100nm1h|DNase-seq|Mcf7	5	DNAse OR TF Binding
6:152133351	rs3778610	Chromatin_Structure||DNase-seq|Mcf7, Chromatin_Structure|Estctrl0h|DNase-seq|Mcf7	5	DNAse OR TF Binding
6:152145916	rs7771894	No data	7
